# Supplementary material for: Iron phosphide anchored nanoporous carbon as an efficient electrode for supercapacitors and the oxygen reduction reaction
Source: RSC Adv. 2019 Aug 13;9(43):25240–7. doi: 10.1039/c9ra04326h (PMC9070042; doi:10.1039/c9ra04326h)
Supplement: RA-009-C9RA04326H-s001 [file RA-009-C9RA04326H-s001.pdf]

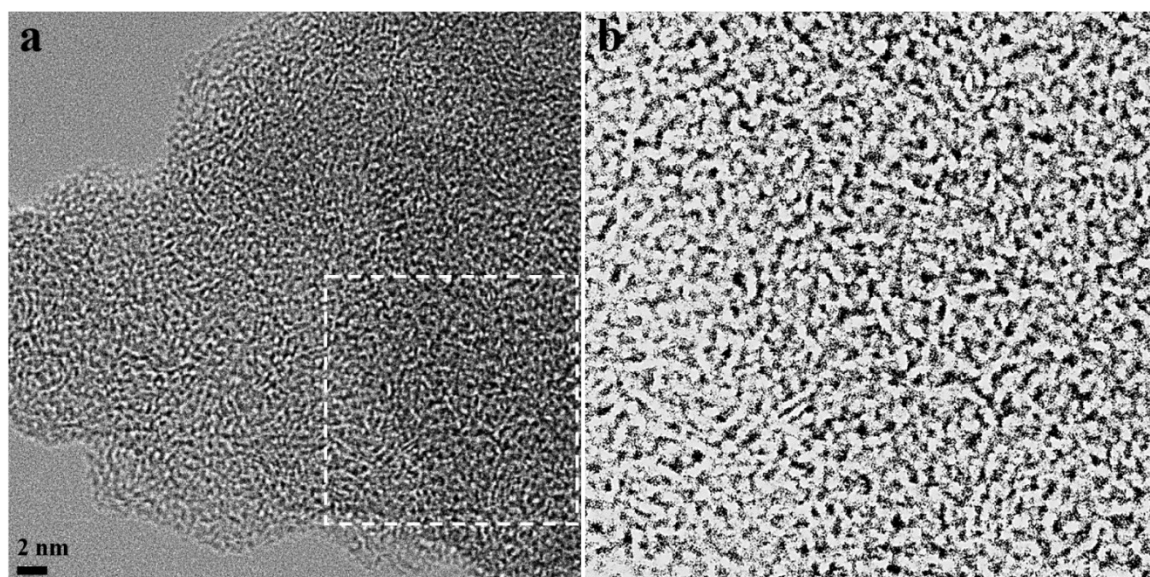

**Fig. S1.** (a) Low- and (b) high-magnification HRTEM images of prepared FeP/C catalysts.

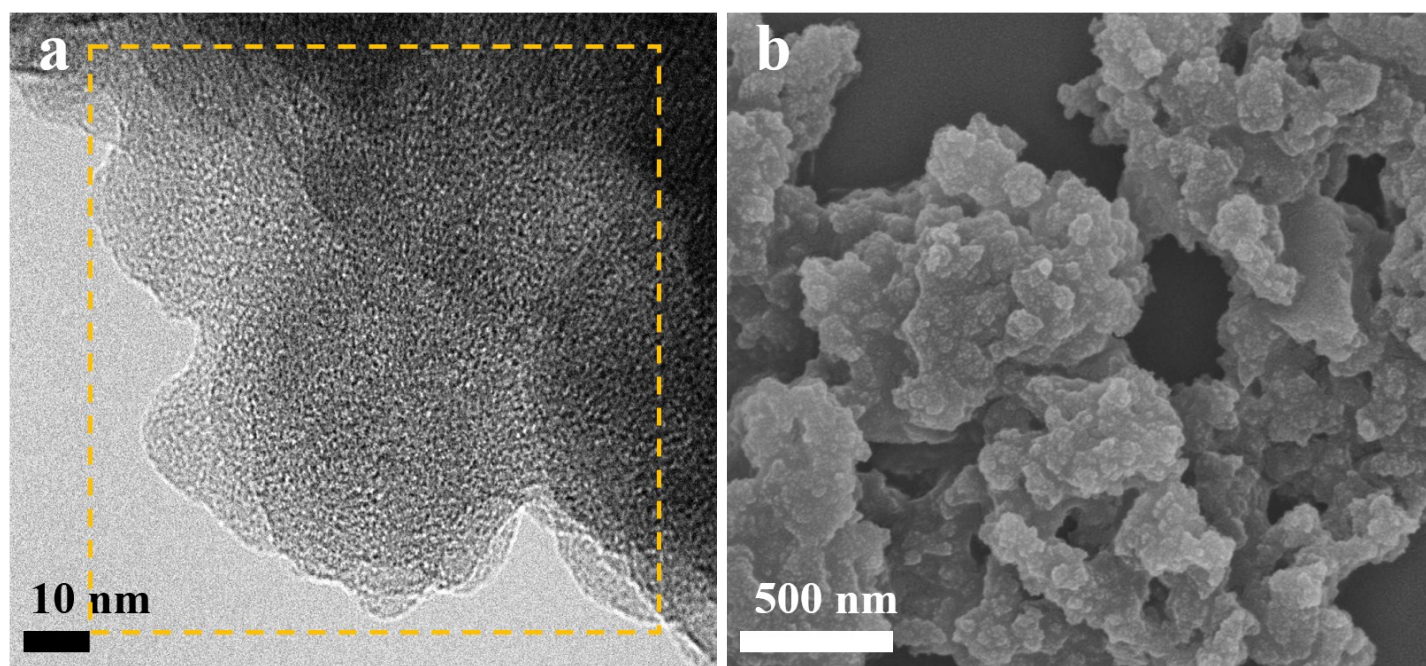

**Fig. S2.** (a) HRTEM and (b) SEM images of prepared FeP/C samples. The yellow box indicates the layered-like structure of FeP/C.

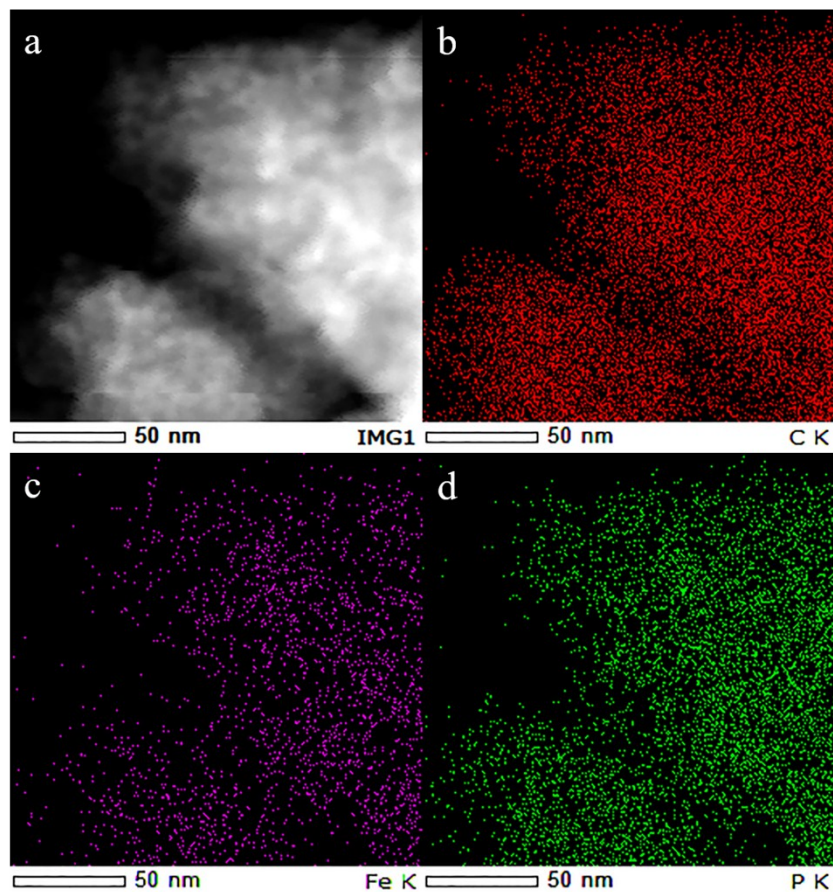

**Fig. S3.** (a) HAADF-STEM and corresponding (b–d) HAADF-STEM-EDS elemental mapping images of C, Fe, and P.

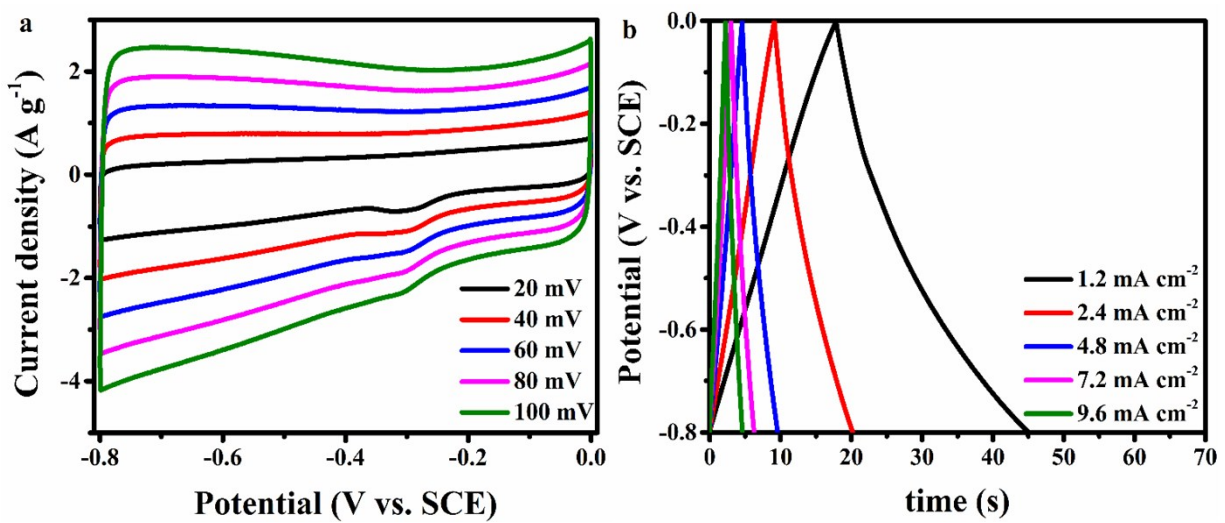

**Fig. S4.** (a) CV curves of P/C at various scan rates; (b) GCD curves of P/C at different current densities.

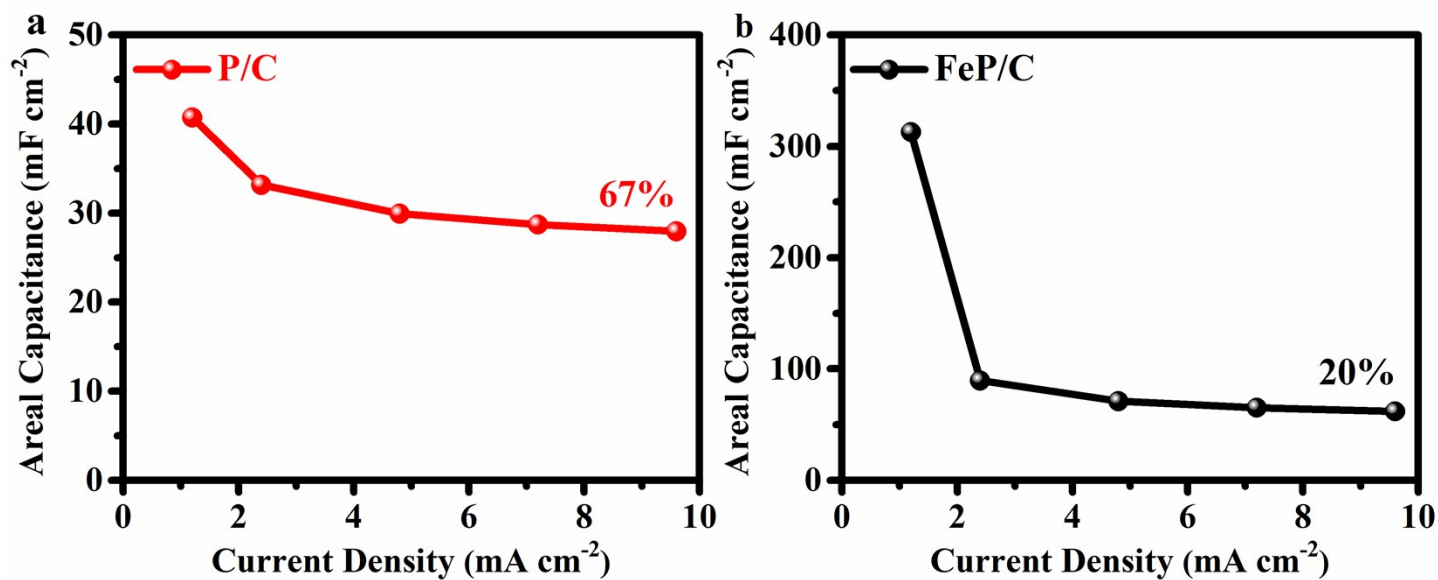

Fig. S5. Areal capacitances at different current densities of (a) P/C and (b) FeP/C samples.

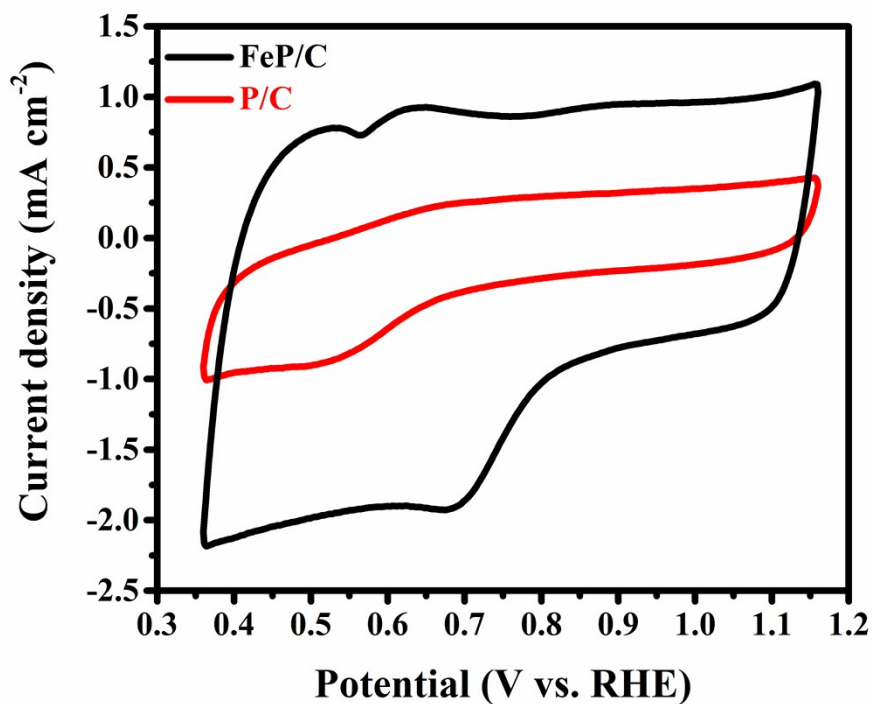

Fig. S6. Cyclic voltammogram curve for P/C and FeP/C recorded in O<sub>2</sub>-saturated 0.1 M KOH at a scan rate of 100 mV s<sup>-1</sup>.

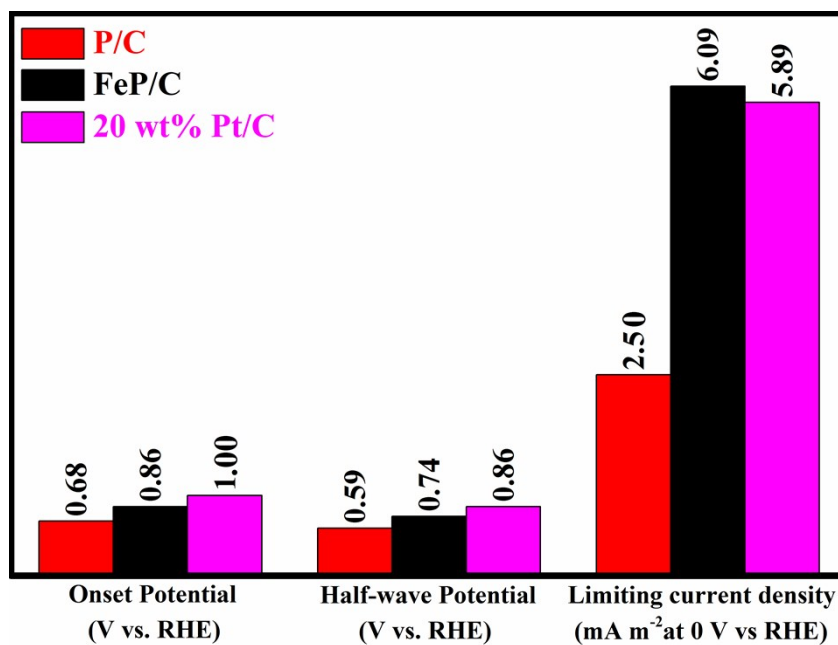

**Fig. S7.** Comparison of the onset, half-wave potentials, and limiting current densities of P/C, FeP/C, and 20 wt% Pt/C.

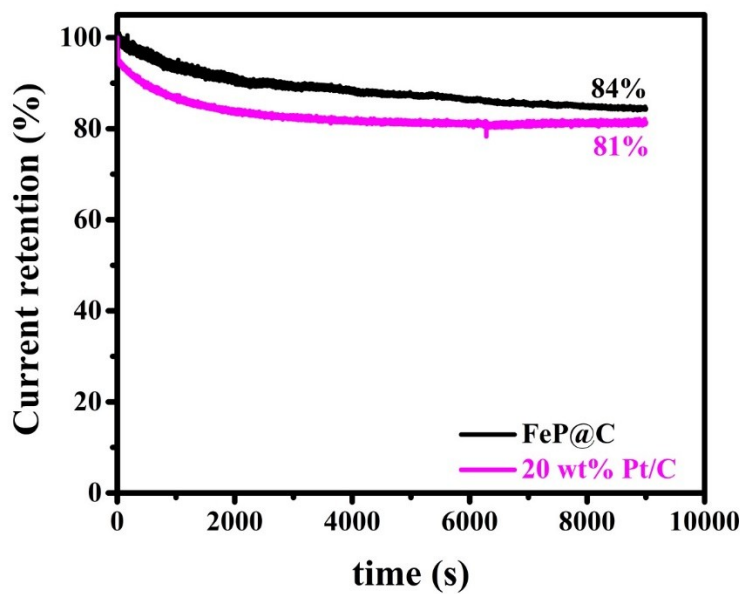

**Fig. S8.** Chronoamperometric measurements of FeP/C and commercial 20 wt% Pt/C for 9000 s at a constant potential of 0.46 V vs. RHE.

**Table S1.** The specific surface area, pore width, and total pore volume of P/C and FeP/C.

| Sample | Pore size (nm) | Specific surface area<br>( $\text{m}^2 \text{g}^{-1}$ ) | Total pore volume<br>( $\text{cm}^3 \text{g}^{-1}$ ) |
|--------|----------------|---------------------------------------------------------|------------------------------------------------------|
| P/C    | 1.79           | 596                                                     | 0.69                                                 |
| FeP/C  | 0.67           | 1269                                                    | 1.44                                                 |

**Table S2.** Comparison data for the electrochemical performance of FeP/C with previously reported Fe-based materials.

| Electrode material                                            | Areal capacitance<br>( $\text{mF cm}^{-2}$ ) | Current density<br>( $\text{mA cm}^{-2}$ ) | Electrolyte                      | Electrode stability                                                                 | Ref.      |
|---------------------------------------------------------------|----------------------------------------------|--------------------------------------------|----------------------------------|-------------------------------------------------------------------------------------|-----------|
| FeP/C                                                         | 313                                          | 1.2                                        | 3 M KOH                          | 95%<br>at 10,000 cycles<br>100 $\text{mV s}^{-1}$                                   | This work |
| FeP<br>nanotube<br>arrays                                     | 300.1                                        | 1                                          | 1 M LiCl                         | 41%<br>at 5000 cycles<br>5 $\text{mA cm}^{-2}$                                      | [1]       |
| $\text{Fe}_2\text{P}_4\text{O}_{12}$ -<br>carbon<br>composite | 251                                          | 1                                          | 0.5 M<br>$\text{H}_2\text{SO}_4$ | Initial 10% loss<br>after 500 cycles<br>5 $\text{mA cm}^{-2}$                       | [2]       |
| $\text{Fe}_2\text{O}_3$<br>nanotubes                          | 180.4                                        | 1                                          | 5 M LiCl                         | 84% at 5000<br>cycles<br>2 $\text{mA cm}^{-2}$<br>(in asymmetric<br>supercapacitor) | [3]       |
| C@ $\text{Fe}_3\text{O}_4$<br>yarn                            | 127                                          | 1                                          | 1 M LiCl                         | 80% at 800 cycles<br>(in solid-state<br>asymmetric<br>supercapacitor)               | [4]       |

---

|                                             |       |   |          |                         |     |
|---------------------------------------------|-------|---|----------|-------------------------|-----|
| Fe <sub>2</sub> O <sub>3</sub><br>nanoflake | 145.9 | 1 | 3 M LiCl | 87.2%<br>at 5000 cycles | [5] |
|---------------------------------------------|-------|---|----------|-------------------------|-----|

---

## References

1. B. Liang, Z. Zheng, M. Retana, K. Lu, T. Wood, Y. Ai, X. Zu and W. Zhou, *Nanotechnology*, 2019, **30**, 295401.
2. R. Soni and S. Kurungot, *New J. Chem.*, 2019, **43**, 399-406.
3. P. Yang, Y. Ding, Z. Lin, Z. Chen, Y. Li, P. Qiang, M. Ebrahimi, W. Mai, C. P. Wong and Z. L. Wang, *Nano Lett.*, 2014, **14**, 731-736.
4. J. Sun, Y. Huang, C. Fu, Y. Huang, M. Zhu, X. Tao, C. Zhi and H. Hu, *J. Mater. Chem. A*, 2016, **4**, 14877-14883.
5. T. Liu, Y. Ling, Y. Yang, L. Finn, E. Collazo, T. Zhai, Y. Tong and Y. Li, *Nano Energy*, 2015, **12**, 169-177.
